# Supplementary material for: A Lignin Silver Nanoparticles/Polyvinyl Alcohol/Sodium Alginate Hybrid Hydrogel with Potent Mechanical Properties and Antibacterial Activity
Source: MDPI journal article supplement (doi:10.3390/gels10040240), 2024-04-01
Supplement: s1 [file s1]

## Supporting Information

### **A lignin silver nanoparticles/polyvinyl alcohol/sodium alginate hybrid hydrogel with potent mechanical properties and antibacterial activity**

Jie Yu<sup>1,2†</sup>, Fangli Ran<sup>2,3†</sup>, Chenyu Li<sup>2\*</sup>, Zhenxin Hao<sup>2,3</sup>, Haodong He<sup>2,3</sup>, Lin Dai<sup>3</sup>, Jingfeng Wang<sup>2\*</sup>, Wenjuan Yang<sup>1\*</sup>

<sup>1</sup>Key Laboratory of Subsurface Hydrology and Ecological Effect in Arid Region of the Ministry of Education, School of Water and Environment, Chang'an University, Xi'an 710064, China

<sup>2</sup>Department of Environment and Health, Institute of Environmental and Operational Medicine, Tianjin 300050, China

<sup>3</sup>Tianjin Key Laboratory of Pulp and Paper, Tianjin University of Science and Technology, Tianjin 300457, China

\*Corresponding author

<sup>†</sup>These authors have contributed equally to this work.

Tel: +86 22 84655052

Fax: +86 22 23328809

E-mail: ywj\_xa@chd.edu.cn (W.Y.),

nk\_lcy710430@hotmail.com (C.L.)

## **Table of Contents**

### **1. Experimental Procedures**

Measurement of Growth inhibition on *E. coli* with Lig-Ag NPs.

### **2. Supplementary Figures**

**Fig. S1.** XRD measurement of Lig-Ag NPs.

**Fig. S2.** Growth inhibition on *E. coli* with Lig-Ag NPs.

**Fig. S3.** Photos of the live bacteria colony on solid LB agar plates exposure to PVA:SA-9:1-80 hydrogel for different durations.

### **3. Supplementary Figures**

**Table S1.** Comparison of antimicrobial properties of PVA/SA/Lig-Ag NPs hydrogels with other hydrogels containing Ag NPs.

## 1. Experimental Procedures

**Measurement of Growth inhibition on *E. coli* with Lig-Ag NPs.** The sample was Lig-Ag NPs, with  $\text{Ag}^+$  concentration of 40 mM during the preparation of silver from lignin. In the antibacterial evaluation, 0.1 g of lignin silver suspension was taken and mixed with 20 mL of diluted bacterial suspension (*E. coli* bacterial load of  $10^5$  CFU/mL), and the remaining bacterial count in the suspension was assessed at 0, 3, 6, and 12 hours. The pre-treatment and bacterial enumeration methods for bacterial suspensions were conducted in accordance with the hydrogel antibacterial assay protocol.

## 2. Supplementary Figures

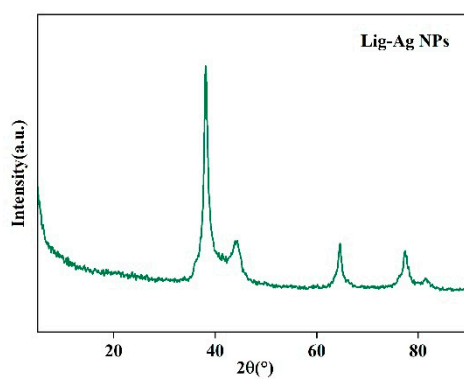

Fig. S1. XRD measurement of Lig-Ag NPs.

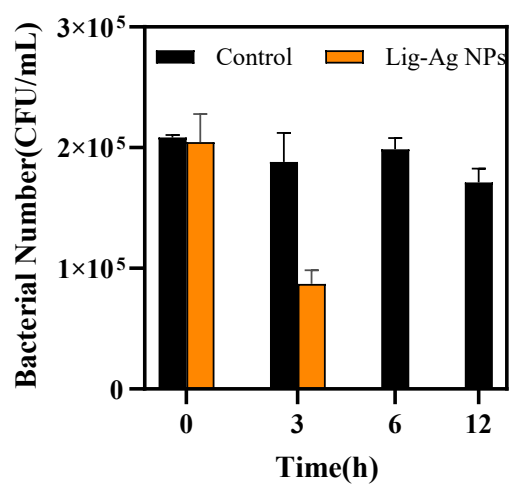

Fig. S2. Growth inhibition on *E. coli* with Lig-Ag NPs.

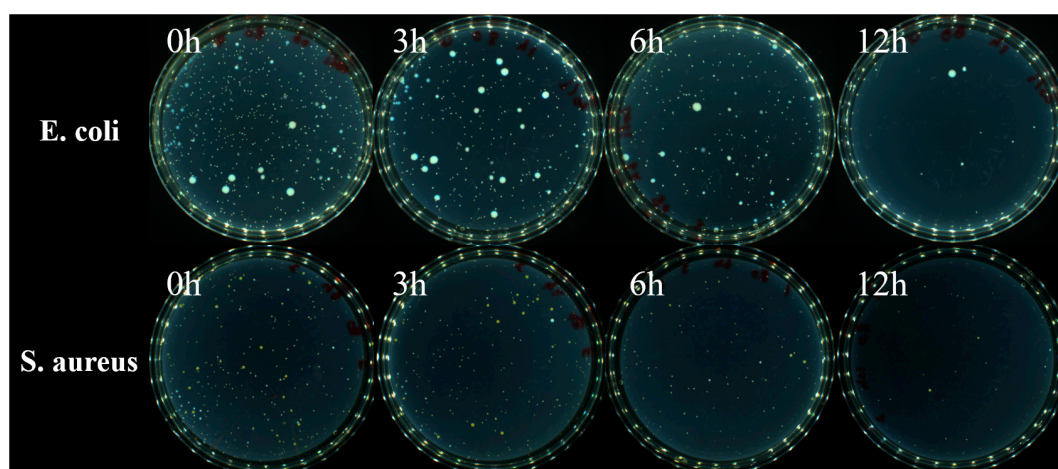

Fig. S3. Photos of the live bacteria colony on solid LB agar plates exposure to PVA:SA-9:1-80 hydrogel for different durations.

### 3. Supplementary Figures

**Table S1.** Comparison PVA/SA/Lig-Ag NPs hydrogels with other hydrogels.

| No.       | Materials                                               | the antimicrobial substances           | Test microorganism            | The antibacterial ratio of the hydrogel | Ref. |
|-----------|---------------------------------------------------------|----------------------------------------|-------------------------------|-----------------------------------------|------|
| 1         | ATC/SA/PVA hydrogel                                     | Ag NPs                                 | <i>Escherichia coli</i>       | 97.1%                                   | [42] |
|           |                                                         |                                        | <i>Staphylococcus aureus</i>  | 95.9%                                   | [42] |
| 2         | SS/PNIPAAm/Ag NPs IPN hydrogel                          | Ag NPs                                 | <i>Escherichia coli</i>       | 95%                                     | [43] |
|           |                                                         |                                        | <i>Staphylococcus aureus</i>  | 97%                                     | [43] |
| 3         | Gel/PP-TA-Ag hydrogel                                   | Ag NPs, TA                             | <i>Escherichia coli</i>       | 70.56%                                  | [44] |
|           |                                                         |                                        | <i>Staphylococcus aureus</i>  | 75.52%                                  | [44] |
| 4         | Ag NPs@MIL-100(Fe)/ GG hybrid hydrogel                  | Ag NPs, MIL100(Fe)                     | <i>Escherichia coli</i>       | 99.6%                                   | [45] |
| 5         | SS/NIPAAm-Ag <sub>3</sub> hydrogel                      | Ag NPs                                 | <i>Escherichia coli</i>       | 99.8%                                   | [46] |
|           |                                                         |                                        | <i>Staphylococcus aureus</i>  | 93.4%                                   | [46] |
| 6         | C <sub>3</sub> N <sub>4</sub> -PDA-Ag@CS composite film | C <sub>3</sub> N <sub>4</sub> , Ag NPs | <i>Pseudomonas aeruginosa</i> | >80%                                    | [47] |
|           |                                                         |                                        | <i>Staphylococcus aureus</i>  | >80%                                    | [47] |
| 7         | Ch-3/Ag hydrogel                                        | Ch, Ag NPs                             | <i>Escherichia coli</i>       | >90%                                    | [48] |
|           |                                                         |                                        | <i>Staphylococcus aureus</i>  | >90%                                    | [48] |
| This work | PVA/SA/Lig-Ag NPs hydrogel                              | Lig-Ag NPs                             | <i>Escherichia coli</i>       | 95.53%                                  |      |
|           |                                                         |                                        | <i>Staphylococcus aureus</i>  | 98.37%                                  |      |
